# Supplementary material for: Exploring immunotherapy in colorectal cancer
Source: PubMed Central journal article supplement (PMC9288068; doi:10.1186/s13045-022-01294-4), 2022-07-16
Supplement: 13045_2022_1294_MOESM1_ESM.pdf [file 13045_2022_1294_MOESM1_ESM.pdf]

**Supplementary Table 1. Summary of Clinical Trials in This Paper**

| Strategy     | NCT Number  | Status                 | Study Results        | Interventions                                                                                                                | Primary Endpoint                            | Phases | Enrollment | Start Date        | Completion Date   |
|--------------|-------------|------------------------|----------------------|------------------------------------------------------------------------------------------------------------------------------|---------------------------------------------|--------|------------|-------------------|-------------------|
| Vaccines     | NCT04912765 | Recruiting             | No Results Available | Biological: Neoantigen Dendritic Cell Vaccine Drug: Nivolumab                                                                | 24-mo RFS; IIRAV                            | 2      | 60         | April 15, 2021    | May 2025          |
|              | NCT03287427 | Not yet recruiting     | No Results Available | Drug: TetMYB Vaccine Drug: BGB-A317                                                                                          | ≥Grade 3 AEs Rates                          | 1      | 32         | May 30, 2018      | December 30, 2022 |
|              | NCT04117087 | Recruiting             | No Results Available | Drug: KRAS peptide vaccine Drug: Nivolumab Drug: Ipilimumab                                                                  | Drug-Related Toxicities Numbers; FcIPMKSTCs | 1      | 30         | May 29, 2020      | June 1, 2024      |
|              | NCT04046445 | Recruiting             | No Results Available | Drug: ATP128 Drug: BI 754091 Drug: VSV-GP128                                                                                 | AEs; SAEs; PFS                              | 1  2   | 96         | July 22, 2019     | December 31, 2023 |
|              | NCT03639714 | Active, not recruiting | No Results Available | Biological: GRT-C901 Biological: GRT-R902 Biological: nivolumab Biological: ipilimumab                                       | AEs; SAEs; ORR; RP2D                        | 1  2   | 214        | February 13, 2019 | March 2023        |
| Chemotherapy | NCT03388190 | Recruiting             | No Results Available | Drug: Nivolumab Drug: FLOX                                                                                                   | PFS                                         | 2      | 100        | May 29, 2018      | December 31, 2021 |
|              | NCT03374254 | Active, not recruiting | No Results Available | Biological: Pembrolizumab Drug: Binimetinib Drug: Oxaliplatin Drug: Leucovorin Drug: 5-Fluorouracil [5-FU]  Drug: Irinotecan | DLT%                                        | 1      | 220        | February 16, 2018 | November 16, 2023 |
|              | NCT03202758 | Unknown status         | No Results Available | Drug: Durvalumab, Tremelimumab and, FOLFOX                                                                                   | Safety                                      | 1  2   | 48         | August 29, 2017   | August 29, 2020   |

|                     |             |                      |                      |                                                                                                                                     |                                                               |     |     |                  |                   |
|---------------------|-------------|----------------------|----------------------|-------------------------------------------------------------------------------------------------------------------------------------|---------------------------------------------------------------|-----|-----|------------------|-------------------|
|                     | NCT04895137 | Recruiting           | No Results Available | Drug: mFOLFOX6+Bevacizumab+PD-1 monoclonal antibody treatment combinations                                                          | PCR rate                                                      | 2   | 42  | May 1, 2021      | May 1, 2024       |
|                     | NCT04301557 | Recruiting           | No Results Available | Drug: PD-1 Antibody Drug: Oxaliplatin Drug: Capecitabine Radiation: External beam radiotherapy Procedure: Total mesorectal excision | pCR rate                                                      | 2   | 25  | July 31, 2020    | December 30, 2024 |
| Antigen Modulation  | NCT05061017 | Recruiting           | No Results Available | Drug: Pixatimod Drug: Nivolumab Drug: Cyclophosphamide (low dose)                                                                   | ORR                                                           | 2   | 61  | October 28, 2021 | September 2026    |
| COX-Inhibitor       | NCT03926338 | Recruiting           | No Results Available | Drug: Neoadjuvant therapy with PD-1 inhibitor plus COX inhibitor Drug: Neoadjuvant therapy with PD-1 inhibitor                      | pCR rate                                                      | 1 2 | 34  | May 10, 2019     | May 1, 2022       |
|                     | NCT03638297 | Recruiting           | No Results Available | Drug: PD-1 antibody + cox inhibitor                                                                                                 | Response rate                                                 | 2   | 27  | August 16, 2018  | August 31, 2021   |
| Neoadjuvant Therapy | NCT03854799 | Recruiting           | No Results Available | Drug: Avelumab Drug: Capecitabine Radiation: EXTERNAL---BEAM IRRADIATION 50.4 GY                                                    | pCR rate                                                      | 2   | 101 | April 1, 2019    | December 2023     |
| Wnt-Inhibitor       | NCT03447470 | Recruiting           | No Results Available | Drug: RXC004 Drug: Nivolumab                                                                                                        | DLT                                                           | 1   | 50  | March 18, 2019   | December 2021     |
|                     | NCT02521844 | No Results Available | No Results Available | Drug: ETC-1922159 Drug: Pembrolizumab                                                                                               | MTD; RD; AEs; ABDIAs; AbECG; CECOGPSs; AbCLTs; AbVSMs; FGRSEs | 1   | 83  | October 2015     | April 2023        |

|                     |             |                        |                      |                                                                                                                                                                                                           |                  |     |     |                   |                   |
|---------------------|-------------|------------------------|----------------------|-----------------------------------------------------------------------------------------------------------------------------------------------------------------------------------------------------------|------------------|-----|-----|-------------------|-------------------|
| PD-L1-<br>Inhibitor | NCT03428126 | Active, not recruiting | No Results Available | Drug: Durvalumab Drug: Trametinib                                                                                                                                                                         | MTD; BOR (CR+PR) | 2   | 29  | March 21, 2018    | November 2021     |
| TGF-β-<br>Inhibitor | NCT02947165 | Completed              | No Results Available | Drug: NIS793 Drug: PDR001                                                                                                                                                                                 | DLTs, AEs, SAEs  | 1   | 120 | April 25, 2017    | June 18, 2021     |
|                     | NCT03724851 | Active, not recruiting | No Results Available | Drug: TEW-7197                                                                                                                                                                                            | MTD              | 1 2 | 67  | November 28, 2018 | August 1, 2023    |
| MAPK-<br>Inhibitor  | NCT02788279 | Completed              | Has Results          | Drug: Atezolizumab (MPDL3280A), an Engineered Anti-PDL1 Antibody Drug: Cobimetinib Drug: Regorafenib                                                                                                      | OS               | 3   | 363 | July 5, 2016      | December 26, 2018 |
| VEGF-<br>Inhibitor  | NCT02873195 | Active, not recruiting | Has Results          | Drug: Atezolizumab Biological: Bevacizumab Drug: Capecitabine Other: Laboratory Biomarker Analysis Other: Placebo                                                                                         | PFS              | 2   | 133 | July 7, 2017      | March 27, 2023    |
|                     | NCT04715633 | Recruiting             | No Results Available | Drug: PD-1 inhibitor plus VEGF inhibitors                                                                                                                                                                 | cCR; pCR         | 2   | 52  | December 1, 2020  | December 31, 2022 |
| LAG3-<br>Inhibitor  | NCT02720068 | Recruiting             | No Results Available | Biological: Favezelimab Biological: Pembrolizumab Drug: Oxaliplatin Drug: Irinotecan Drug: Leucovorin (Calcium Folate)  Drug: Fluorouracil [5-FU]  Biological: Favezelimab/Pembrolizumab Drug: Lenvatinib | DLT; AEs         | 1   | 576 | May 2, 2016       | December 13, 2023 |
|                     | NCT03642067 | Recruiting             | No Results Available | Drug: Nivolumab Drug: Relatlimab                                                                                                                                                                          | ORR              | 2   | 96  | February 12, 2019 | February 2024     |
| Dual-Drug           | NCT03442569 | Active, not recruiting | Has Results          | Drug: Panitumumab Drug: Nivolumab Drug: Ipilimumab                                                                                                                                                        | ORR              | 2   | 56  | March 9, 2018     | March 31, 2024    |

|               |             |                        |                      |                                                                                               |                                                |      |     |                   |                   |
|---------------|-------------|------------------------|----------------------|-----------------------------------------------------------------------------------------------|------------------------------------------------|------|-----|-------------------|-------------------|
|               | NCT04258111 | Active, not recruiting | No Results Available | Biological: IBI310 (anti-CTLA-4 antibody) Biological: Sintilimab(anti-PD-1 antibody)          | ORR                                            | 2    | 4   | August 27, 2020   | May 2023          |
|               | NCT02870920 | Active, not recruiting | Has Results          | Drug: Tremelimumab<br>Drug: Durvalumab<br>Other: Best Supportive Care                         | OS; PFS; ORR                                   | 2    | 180 | August 10, 2016   | December 31, 2021 |
| Demethylation | NCT02959437 | Terminated             | Has Results          | Drug: Azacitidine Drug: Pembrolizumab Drug: Epacadostat Drug: INCB057643 Drug: INCB059872     | AEs; ORR                                       | 1  2 | 70  | February 27, 2017 | March 2, 2020     |
|               | NCT02811497 | Completed              | No Results Available | Drug: Azacitidine Drug: Durvalumab                                                            | ORR                                            | 2    | 28  | September 2016    | August 4, 2020    |
| Deacetylation | NCT02890069 | Active, not recruiting | No Results Available | Biological: PDR001 Drug: LCL161 Drug: Everolimus Drug: Panobinostat Drug: QBM076 Drug: HDM201 | DLTs; FDIR; AEs; SAEs; CBPLP; Dose intensities | 1    | 298 | October 14, 2016  | February 3, 2022  |
|               | NCT02512172 | Active, not recruiting | No Results Available | Drug: Oral CC - 486 Drug: Romidepsin Drug: MK - 3475                                          | TIL; DLT                                       | 1    | 27  | February 19, 2016 | January 2022      |
| TKI           | NCT04963283 | Recruiting             | No Results Available | Drug: Cabozantinib Drug: Nivolumab                                                            | DCR                                            | 2    | 46  | June 23, 2021     | February 9, 2025  |
|               | NCT04866862 | Not yet recruiting     | No Results Available | Drug: Combination of Fruquintinib and Camrelizumab                                            | ORR                                            | 2    | 32  | May 1, 2021       | April 30, 2024    |
|               | NCT04819516 | Recruiting             | No Results Available | Procedure: high-intensity focused ultrasound therapy Drug: Toripalimab                        | AEs; AbCLTs                                    | 1    | 10  | December 7, 2020  | December 2025     |
|               | NCT04764006 | Recruiting             | No Results Available | Drug: Surufatinib                                                                             | ORR                                            | 2    | 10  | October 13, 2021  | November 1, 2023  |

|                 |             |                        |                      |                                                                                                |                                  |      |     |                   |                   |
|-----------------|-------------|------------------------|----------------------|------------------------------------------------------------------------------------------------|----------------------------------|------|-----|-------------------|-------------------|
|                 | NCT04110093 | Recruiting             | No Results Available | Drug: Regorafenib and PD-1 inhibitor                                                           | ORR; PFS                         | 1  2 | 120 | March 1, 2019     | August 31, 2021   |
|                 | NCT03797326 | Active, not recruiting | No Results Available | Biological: Pembrolizumab Drug: Lenvatinib                                                     | ORR; AEs                         | 2    | 590 | February 12, 2019 | December 22, 2023 |
|                 | NCT03977090 | Recruiting             | No Results Available | Drug: Geptanolimab Injection Drug: Fruquintinib                                                | AEs; DLT; RDE                    | 1    | 21  | April 4, 2019     | December 2021     |
|                 | NCT03946917 | Active, not recruiting | No Results Available | Drug: JS001 Drug: regorafenib tablet                                                           | MTD; DLT; ORR                    | 1  2 | 44  | March 12, 2019    | November 20, 2021 |
|                 | NCT03903705 | Recruiting             | No Results Available | Drug: Fruquintinib in Combination with Sintilimab                                              | DLT; MTD; AEs; ORR; DCR; PFS; OS | 1  2 | 208 | April 25, 2019    | July 2021         |
| Radiotherapy    | NCT04001101 | Recruiting             | No Results Available | Combination Product: RT and Anti-PD-1 Drug: Anti-PD-1                                          | ORR                              | 2    | 140 | October 10, 2019  | April 2024        |
| PI3K-Inhibitor  | NCT03711058 | Recruiting             | No Results Available | Drug: Copanlisib Drug: Nivolumab                                                               | MTD; ORR                         | 1  2 | 54  | January 17, 2019  | January 2022      |
| STAT3-Inhibitor | NCT03647839 | Completed              | No Results Available | Drug: Nivolumab 10 MG/ML Drug: BNC 105 Drug: BBI608                                            | ORR                              | 2    | 90  | September 6, 2018 | April 9, 2021     |
| Triple-Drug     | NCT05035381 | Recruiting             | No Results Available | Drug: Pembrolizumab (PD-1 Inhibitor) Combined with Bevacizumab and FOLFIRI Regimen             | ORR                              | 2    | 10  | January 1, 2019   | December 30, 2022 |
|                 | NCT05019534 | Recruiting             | No Results Available | Drug: Vemurafenib Oral Tablet [Zelboraf] Drug: Cetuximab Injection [Erbixx] Drug: Camrelizumab | RP2D; MTD                        | 1    | 12  | May 1, 2021       | December 1, 2021  |

|                    |             |                        |                      |                                                                                                                                                                                                                                                      |                        |               |     |                    |                   |
|--------------------|-------------|------------------------|----------------------|------------------------------------------------------------------------------------------------------------------------------------------------------------------------------------------------------------------------------------------------------|------------------------|---------------|-----|--------------------|-------------------|
|                    | NCT04940546 | Recruiting             | No Results Available | Drug: Sintilimab Drug: Oxaliplatin Drug: Capecitabine Drug: Bevacizumab                                                                                                                                                                              | AEs                    | 1  2          | 30  | June 16, 2021      | June 30, 2023     |
|                    | NCT04547166 | Not yet recruiting     | No Results Available | Drug: HLX10/Placebo Drug: HLX04/Avastin                                                                                                                                                                                                              | OS; PFS; ORR; DOR; DCR | 3             | 666 | September 18, 2020 | June 30, 2025     |
|                    | NCT04194359 | Recruiting             | No Results Available | Drug: sintilimab injection Drug: Control Test                                                                                                                                                                                                        | PFS                    | 3             | 436 | February 4, 2021   | June 2025         |
|                    | NCT04072198 | Recruiting             | No Results Available | Drug: Nivolumab Drug: Bevacizumab Drug: Irinotecan Drug: Oxaliplatin Drug: Leucovorin Drug: fluoruracil                                                                                                                                              | ORR                    | 2             | 70  | September 26, 2019 | September 2022    |
|                    | NCT03608046 | Recruiting             | No Results Available | Drug: Avelumab Drug: Cetuximab Injection Drug: Irinotecan                                                                                                                                                                                            | ORR                    | 2             | 59  | October 3, 2018    | December 31, 2023 |
|                    | NCT03414983 | Active, not recruiting | No Results Available | Biological: Nivolumab Drug: Oxaliplatin Drug: Leucovorin Drug: Fluorouracil Drug: Bevacizumab                                                                                                                                                        | PFS                    | 2  3          | 195 | February 20, 2018  | June 30, 2023     |
| Arginase-Inhibitor | NCT02903914 | Active, not recruiting | Has Results          | Drug: INCB001158 Drug: Pembrolizumab                                                                                                                                                                                                                 | AEs                    | 1  2          | 260 | September 14, 2016 | November 8, 2021  |
| FMT                | NCT04729322 | Recruiting             | No Results Available | Procedure: Biopsy Procedure: Fecal Microbiota Transplantation Drug: Fecal Microbiota Transplantation Capsule Drug: Metronidazole Drug: Neomycin Biological: Nivolumab Biological: Pembrolizumab Other: Questionnaire Administration Drug: Vancomycin | ORR                    | Early Phase 1 | 15  | February 22, 2021  | December 31, 2021 |
| TCB                | NCT02650713 | Completed              | No Results Available | Drug: Atezolizumab Drug: RO6958688                                                                                                                                                                                                                   |                        | 1             | 228 | January 7, 2016    | January 13, 2020  |

TKI: Tyrosine Kinase Inhibitor; FMT: Fecal microbiota transplantation; 24-mo RFS: 24-month Relapse Free Survival ;IIRAV: Induced immune response against vaccinated NAs; AEs: adverse events; FcIPMKSTCs: Fold change in interferon-producing mutant-KRAS-specific CD8 and CD4 T cells at 16 weeks; SAEs: serious adverse events; PFS: Progression-free survival; ORR: Objective Response Rate; RP2D: recommended

Phase 2 dose; DLT: dose limiting toxicity; pCR: Pathological Complete Response; MTD: Maximum Tolerated Dose; RD: Recommended Dose; ABDIAs: adverse bone density imaging assessments; AbECG: abnormal 12-lead electrocardiogram (ECG) readings; CECOGPS: Change in Eastern Cooperative Oncology Group performance status; AbCLTs: abnormal clinical laboratory test results; AbVSMs: abnormal vital sign measurements; FGRSEs: fatigue and gastrointestinal-related side effects; BOR: Best Overall Response; OS: Overall Survival; cCR: Clinical complete response; DCR: Disease Control Rate; RDE: Extended period recommended dose; DOR: Duration of response; FDIR: Frequency of dose interruptions and reductions; CBPLP: Changes between baseline and post-baseline laboratory parameters and vital signs; TIL: Degree of change in tumor infiltrating lymphocytes.
